# Supplementary material
Source: PubMed Central journal article supplement (PMC3353760)
Supplement: Supp_Data.pdf [file Supp_Data.pdf]

|            | — α1 —                     | — α2 —                           | — α3 —                                            |     |
|------------|----------------------------|----------------------------------|---------------------------------------------------|-----|
| human      | TRTVFSSTQLCVLNDRFQRQKYL    | SLQQMQELSNILNLSYKQVKTWFQ         | NRMKSKRWCK--NWP--KNSNGVTQKASAP--TYP               | 180 |
| chimpanzee | TRTVFSSTQLCVLNDRFQRQKYL    | SLQQMQELSNILNLSYKQVKTWFQ         | NRMKSKRWCK--NWP--KNSNGVTQKASAP--TYP               | 180 |
| rat        | MRTVFSQAQLCALKDRFQRQRYL    | SLQQMDLSTILNLSYKQVKTWFQ          | NRMKCKRWCK--NWL--KTSNGLTQ--GSAPVEYPSI             | 183 |
| mouse      | MRTVFSQAQLCALKDRFQRQKYL    | SLQQMQELSSILNLSYKQVKTWFQ         | NRMKCKRWCK--NWL--KTSNGLIQKGSAPVEYPSI              | 182 |
| cow        | IRTVFSQTLQCVLNDRFQRQKYL    | SLQQMQELSNILNLSYKQVKTWFQ         | NRMKCKRWCK--NWP--KNSNGMPPQGP--AMAEYPGFYS          | 174 |
| goat       | IRTVFSQTLQCVLNDRFQRQKYL    | SLQQMQELSNILNLSYKQVKTWFQ         | NRMKCKRWCK--NWP--RNSNGVPPQP--ATAEYPGFYS           | 174 |
| pig        | IRTVFSQTLQCVLNDRFQRQKYL    | SLQQMQELSNILNLSYKQVKTWFQ         | NRMKCKRWCK--NWP--RNSNSVIQG--SASTEYPGFYS           | 179 |
| cat        | SRTAFSKEQLLTLHQRFSQKYL     | SPQIRELAAALGLTYKQVKTWFQ          | NRMKCKRWCK--NWP--KNNNVSQNSANPEYPGFYS              | 181 |
| opossum    | MRTVFSQAQLNVLNSRFVEQKYL    | SPQIRNVENLNTYKQVKTWFQ            | NRMKSKRWCKD--MWT--KNGNRNVQNGSALGEYISLYSP          | 190 |
| platypus   | IRTAFTQTQLNLTNRFRQKYL      | SPQIRDLAMSLNLTLYKQVKTWFQ         | NRMKSKRD--KDNLTG--RR--VSMVQNGSLPA--YMSLYSA        | 271 |
| chicken    | SRTAFSKEQLLTLHQRFSQKYL     | SPQIRELAAALGLTYKQVKTWFQ          | NRMKCKRWCK--NWP--KNSNGMPPQGP--AMAEYPGFYS          | 181 |
| zebrafinch | SRTAFSKEQLLTLHQRFSQKYL     | SPQIRELAAALGLTYKQVKTWFQ          | NRMKCKRWCK--NWP--KNSNGMPPQGP--AMAEYPGFYS          | 187 |
| ambystoma  | KRTCFSEQLVALHRMFQKQHYMNP   | QAQQLAADLNTYKQVKNWFQ             | NRMKCKRWCK--NWP--KNSNGMPPQGP--AMAEYPGFYS          | 170 |
| tetraodon  | ARTAFSESMNVLVHFKFSVQRYL    | PPAEMKNLAEVTLTYK-----            | QNRMKLRRHQKDT--SWVSE--Y--I--NNGT--SVQGT--VYNI--PP | 252 |
| fugu       | ARTAFSESMNVLVHFKFSVQRYL    | PPAEMKNLAEVTLTYK-----            | QNRMKLRRHQKDT--SWVSE--Y--I--NNGT--SVQGT--VYNI--PP | 256 |
| medaka     | VRAAFSESMSTLVQRFSVQRYL     | PAEMKNLAEVTLTYK-----             | QNRMKLRRHQKDT--SWVSE--Y--I--NKDNTA--ADTV--FNS--PV | 294 |
| zebrafish  | TRAAFSESMNVLVHFKFSVQRYL    | PPAEMKNLAEVTLTYK-----            | QNRMKLRRHQKDT--SWVSE--Y--I--NKDNTA--ADTV--FNS--PV | 273 |
| xvent2.1   | LRTAFTSDQISTLEKTFQRHRYL    | GASERRKLAALKLQSLSEVQIKTWFQ       | NRMKYKREIQDGRPDSYH-----PAQF---FGV                 | 264 |
| consensus  | R Fs Qφ L F QbYφ φ φ φ     | LtYKQVKpWFQ                      | NRMK b b p W b                                    |     |
| human      | YHQGCLVNP--TGNL--PMKS---   | NQTWNS--TWSNQ--QNIQSWSN--H--SN-- | -----TQTWCTQSWNNQAWN--SPFY                        | 250 |
| chimpanzee | YHQGCLVNP--TGNL--PMKS---   | NQTWNS--TWSNQ--QNIQSWSN--H--SN-- | -----TQTWCTQSWNNQAWN--SPFY                        | 250 |
| rat        | YSQGYLMNA--SGNL--PVWG---   | SQTWNP--TWNQ--TWNPTWSNQ--T--     | TNPTWSNQAWSTQSWCTQACNSQTWNA                       | 264 |
| mouse      | YPQGYLVNA--SGSL--MWG---    | SQTWNP--TWSQ--TWNPTWNNQ--T--     | TNPTWSSQAWTAQSW-----NGQPWNA                       | 258 |
| cow        | YHQGCLVN--SPGNL--PMWG---   | NQTWNP--TWSNQSWSNSWSN--H--SN--   | -----SQAWCPQAWNQPWN--NQFN                         | 244 |
| goat       | YHQGCLVN--SPGNL--PMWG---   | NQTWNP--TWSNQSWSNSWSN--H--SN--   | -----SQAWCPQAWNQPWN--NQFN                         | 244 |
| pig        | YHQGCLVNA--SGNV--PVWG---   | NQSWNP--TWSNQSWSNSQ--T--W--      | -----SQTWCPQAWNQPWN--SOLN                         | 249 |
| cat        | YHQGYLMN--TSGNL--PIWG---   | NQTWNSQSWSNQTWNSQSWSNQ--T--      | WNSQSWNSQ--T--WNSQ--T--WNSQ--T--                  | 261 |
| opossum    | FHQDYMVS--SSGTL--PVWS---   | NQTWNNQ--FQN--SGG--              | -----SYQHQIF-----QHSYPASDLGAT                     | 255 |
| platypus   | LQHSYLVNPA--TGNL--PPKA---  | GQAW--AS-----                    | PGGF--VQ--GVGQQQHPA--A--S--                       | 331 |
| chicken    | FHQGFPV--VANRNLQAVTSAHQAYS | SSGQTYGNGGGLYPFMAVEDEGFFG        | GGTSC--NTQQAMGLLS--QQMNFYHGYST                    | 269 |
| zebrafinch | FHQGYPIA--TGNL--GNIQTVA--- | PCQHYGAGQNAVITV--T--S--          | EDGGVFGK-------SVQCTVGFIAQHKVDFYH                 | 262 |
| ambystoma  | CPESSSHLPORVTVHH--SA--     | LAQRVTSHPYQKYSIGIQNH--QKVL       | SEDAATVQHRSAAPQ--CM--GPQQYMRH--                   | 248 |
| tetraodon  | YSTSVSIYFKIV-----          | VYTMFGQVFS--GTLYRL--NLKHS        | SM--IFIFFFQYQG--SQHRM--DASFKN                     | 328 |
| fugu       | YSPVSIYHLKST-----          | IYTNVLCGIF--FSTSMV--LMA          | SNLTGMEK--NVFSHQYQG--GRPQHMV                      | 334 |
| medaka     | APHVP-----                 | PY--QG--GMSHLRHH--YN-----        | QHMMGAAFKNTPHN--LAFYLAAMGNPP                      | 341 |
| zebrafish  | ASQS-----                  | QFQ-----                         | SEPPGA--NQSH--YIN-----                            | 321 |
| xvent2.1   | YG-----                    | -----                            | -----                                             | 295 |
| human      | CMQFQP--NSPASILSAALEA--AG  | GLNVIQCTTRYFSTP--QTM--L--        | FLNYSMNM--QPE--V-----                             | 305 |
| chimpanzee | CMQFQP--NSPASILSAALEA--AG  | GLNVIQCTTARYFSTP--QTM--L--       | FLNYSMNM--QPE--M-----                             | 305 |
| rat        | YVPLQQ--NFSASILEANLEATR--  | ESQ-----                         | AH--FSTP--QALEL--FLNYSVNS                         | 311 |
| mouse      | YVQLQQ--NFSASILEVNLATR--   | ESH-----                         | AH--FSTP--QALEL--FLNYSVTP                         | 305 |
| cow        | GIQLQQ--NSPVCILSATL--GT    | AGENYINVIQCTVYKFNSSQQQITL        | --L--FPNYPLNI--QPE--L-----                        | 300 |
| goat       | GIQLQQ--NSPVCILSATL--GT    | AGENYINVIQCAVKYFSSQQQITL         | --L--FPNYPLNI--QPE--L-----                        | 300 |
| pig        | QLFQQ--NSPISILAVLE--TAG    | NHNVIQCTSKYCSQIQIM--L--          | FPNYSMNI--QPE--M-----                             | 305 |
| cat        | QIQLQQ--NSV--SILQSILE--TT  | GESHSVIQCTAKYFSAQ--QIM--L--      | FPNY-----                                         | 311 |
| opossum    | SLSFNT--PYPM--YLPSYSMNMQL  | THSKSEEDY--YR--                  | -----QAS--AQTF--L--P--S--                         | 309 |
| platypus   | ALTFSSPGAADCLPAFPTLPLA     | --HIKAE--SYS--PTFLAA--           | HSQFP--D--SGLHLYQP-----                           | 385 |
| chicken    | E--TYS--FQS--TSS--         | -----                            | -----                                             | 309 |
| zebrafinch | VQQLH--G--WQCQISKKNLIL     | SPIRVVG--SDVQVQHLGK--            | KAFNMVSHSVLAQPPPSLAT--IK                          | 342 |
| ambystoma  | ARPV--GYNLK--TPLQYPSMAP    | PNYYY--                          | QPPPYIH--QQRG--P--IRF--Q--                        | 297 |
| tetraodon  | STGYP--                    | SWTTVPQCTAVPIRQQLDWP             | TN--PHVFNVAFGAN--QCTSF                            | 384 |
| fugu       | SAGYP--                    | SWTSVPQCTAVPIRQHRDWP             | TN--PNTGHY--YNPHVFNVGF                            | 398 |
| medaka     | TAGYPP--                   | WSSSPQAAPVSRPQVPGW               | PLPPGRSQFGFCPIPY--PS                              | 420 |
| zebrafish  | QATSRPPGT--PLPPAV--THY--   | FPNPI--SYMPAR--GSNAVNK           | SSSPSPLAT--S--P-----                              | 384 |
| xvent2.1   | TPMYAMHPPAM--SL--          | -----                            | NH--FNSPP--FQ--MFYMPQQLG                          | 333 |

SUPPLEMENTARY FIG. S1. (Continued)

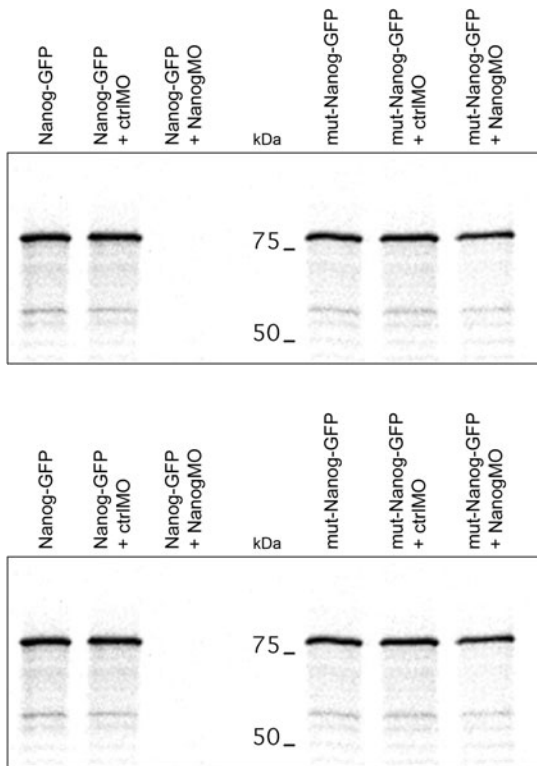

**SUPPLEMENTARY FIG. S2.** In vitro MO-binding test. The binding efficiency of NanogMO was tested in vitro in a coupled transcription/translation system (TNT<sup>®</sup>T7/SP6 Coupled Reticulocyte Lysate System; Promega) in the presence of <sup>35</sup>S labeled methionine. The translation of a *Nanog-GFP* fusion RNA is inhibited by NanogMO but not by ctrlMO. The inhibitory effect of NanogMO is specific, because transcription/translation of 0.5 ng *mut-Nanog-GFP* plasmid is inhibited by neither 10 ng ctrlMO nor 10 ng NanogMO. MO, morpholino oligonucleotides; ctrl MO, control MO.

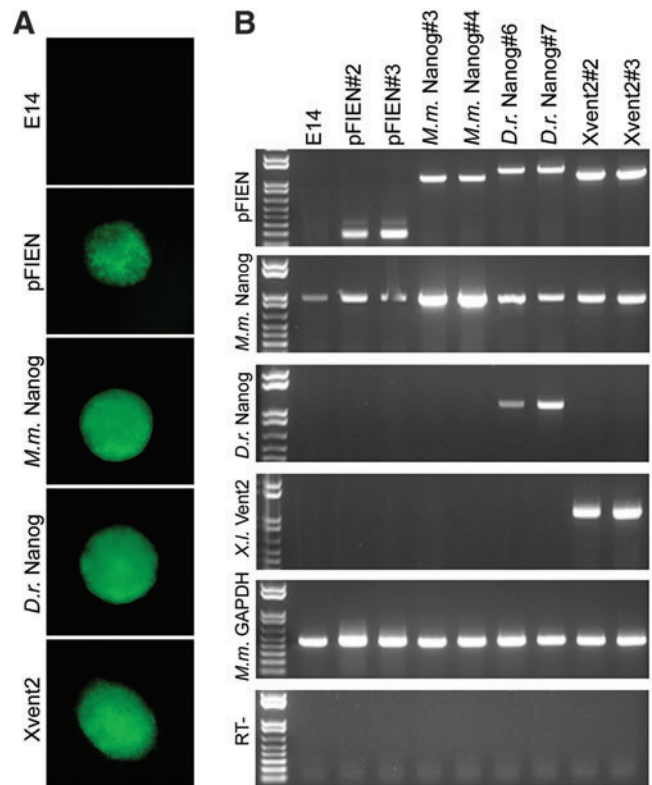

**SUPPLEMENTARY FIG. S3.** Transfection control of mouse E14 ES cells. *M.m. Nanog*, *D.r. Nanog*, and *Xvent2* sequences were integrated into the eukaryotic expression vector pFIEN (provided by P.R. Tata, Ulm), which harbors a neomycin/kanamycin resistance cassette, a pCAGGS derived promoter, the integrated sequence, an IRES, and the EGFP/SV40 polyA part of the pIRES2-EGFP vector (Clontech). (A) Stably transfected E14 mouse ES cell lines with *M.m. Nanog*, *D.r. Nanog*, *Xvent2*, and an empty control (pFIEN) vector after 7 passages. EGFP (Enhanced Green Fluorescence Protein) signal indicates the stable expression of each construct. (B) Single GFP-positive ES cell clones were picked, expanded, and tested for proper stable expression of the constructs by RT-PCR with indicated primer pairs (Supplementary Table S1C). Two independent cell clones of each construct were used. RT-: cDNA synthesis without reverse transcriptase, analyzed with GAPDH primers used as an internal control. Numbers represent different cell lines. ES, embryonic stem; RT-PCR, reverse transcriptase-polymerase chain reaction.

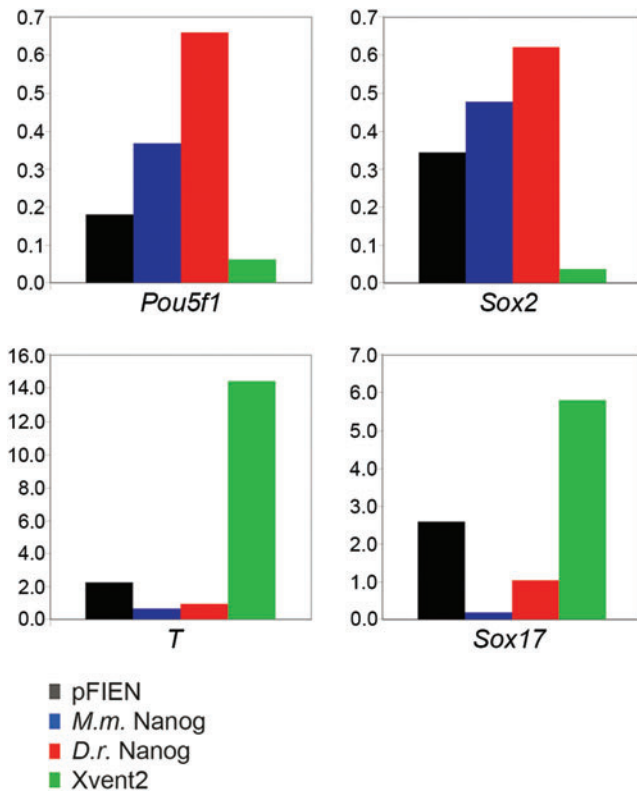

**SUPPLEMENTARY FIG. S4.** Analysis of marker gene expression of embryoid bodies after 4 days of culturing in the absence of leukemia inhibitory factor. RNA was extracted and submitted to RT-PCR by using primers for *Pou5f1*, *Sox2*, *T*, and *Sox17* (see Supplementary Table S1C). Although *M.m.* Nanog and *D.r.* Nanog transfected cells show higher expression of pluripotency genes (*Pou5f1*, *Sox2*), Xvent2 and pFIEN transfected cells show higher expression of differentiation markers (*T*, *Sox17*).



SUPPLEMENTARY TABLE S1. PRIMERS AND CONDITIONS USED FOR REAL-TIME REVERSE  
TRANSCRIPTASE-POLYMERASE CHAIN REACTION  
(A) PRIMERS USED FOR *XENOPUS LAEVIS*

| Primer pairs      | Sequence forward primer (5' → 3) | Sequence reverse primer (5' → 3) | Annealing temperature (°C)/time(s) |
|-------------------|----------------------------------|----------------------------------|------------------------------------|
| BMP4              | TTTATGTGGATTTCAGCGATGTG          | AGCCAAGGGAAATGGACAATCT           | 53/5                               |
| Cdx2              | TACCCCTCTGCCCCCA                 | GGAAGGTGCCCCATGGTCT              | 53/5                               |
| Chordin           | AACTGCCAGGACTGGATGGT             | GGCAGGATTTAGAGTTGCTTC            | 52/5                               |
| Cxcr4b            | CCTCACTACCGACACATTCATGAT         | CCTGTGTAGGGTGTTCCTCCA            | 54/5                               |
| E-cadherin        | GACTCACTCCTTGTGTTCGATTACG        | TGGGCGAGTTCAGAGAGCTG             | 54/5                               |
| Ectoderm          | TGTGTAAGCTCAGCCTGCAA             | GACAGCGGCGACAGAATGA              | 54/5                               |
| Epidermal Keratin | GCTCATCTAGCAAAGGTGGCTT           | AGCCAGAACCCACACCACTG             | 54/5                               |
| Fut1              | GAGGGTGGGATATGGACTGTATAA         | GGACAGAGCATAACAAGGTGGC           | 54/5                               |
| Gata4             | GCTACCTCACCTGTCTATGTGCC          | TTTGTTGAGATGAGCCGCTG             | 53/5                               |
| Gata6             | ACAATCACATCAGCGCAAGGA            | GACTGGAGAGCTGGCAGCG              | 53/5                               |
| Geminin H         | GGATATGGAGAAGCCTACCATGTC         | GATGCAGATGGCTGGATTACTTT          | 53/5                               |
| Grhl1             | CATCGCTCACCCCATCAA               | CAAAGGCGACAATCCGTTCT             | 53/5                               |
| Gsc               | GATGCCGCCAGTGCCTC                | TGCAGCTCAGTTCGTGACAAA            | 54/5                               |
| H4                | GGCAAAGGAGGAAAAGGACTG            | GGTGATGCCCTGGATGTTGT             | 55/5                               |
| Klf4              | ATGAACCGACCCGCCAC                | AAGCTCGATCACATCGCTGA             | 53/5                               |
| Ncam              | AAGTCCAACAGAGGCAACCAA            | GTCCCCCATCAATTTGAAA              | 54/5                               |
| Oct60             | TGACGGAAATTGCCAAAGAAC            | CCTTGGACATTCTGAATTTGCTC          | 54/5                               |
| PepCK             | CCAACGTGGCAGAGACCAAGT            | TGACCCAGGAGGAAGTGG               | 54/5                               |
| Sall4             | CAGTATGCCACCGCGCTT               | TACTGATAACAGGAGCACCGCC           | 54/5                               |
| Siamois           | AAGGAACCCACCAGGATAAAT            | TGTTGTCTGGTCTTCAAACCTCA          | 54/5                               |
| Sod2              | CAGGCTCAGTGTGTTGTGGCA            | TCATAAGGCAAGTCAGGCAGAG           | 52/5                               |
| Tert              | CAGGTGCTTGGGATTGTGGA             | CCTGAACTTCTCAGAGTCTCCCTCT        | 54/5                               |
| Tsg1              | CAGCAAATGCCTAATACAGGAGCT         | GTGCCAGACACAGCATACACTC           | 55/5                               |
| Wee1b             | AGCACCCCTCAGGTCAACATC            | CAAAGCCCGCAGAAGACT               | 54/5                               |
| Xbra              | AGCTCACCAACGAGATGATCG            | AACCGTATACATTGCATTGGGAT          | 54/5                               |
| Xema              | TCCGCAGAAAGAGGAAAAGAAA           | ACTTAGCGGGCTCCCTTCAG             | 54/5                               |
| XSox2             | CCAGTCCACCTGTAGTCACCTCT          | CACTTCTGCCCCAGGTAGGTAC           | 54/5                               |
| XSox3             | GTTTTATGGTTTGGTCCCGGG            | AGCGCCCAATCTTTTGCTG              | 55/5                               |
| XSox17α           | TGGCAAGTCGTGGAAGTCTCT            | GTGGTCTGCATGTGCTGC               | 54/5                               |

(B) PRIMERS USED FOR *DANIO RERIO*

| Primer pairs | Sequence forward primer (5' → 3) | Sequence reverse primer (5' → 3) | Annealing temperature (°C)/time(s) |
|--------------|----------------------------------|----------------------------------|------------------------------------|
| BMP4         | CCCAGGAAGGGAAGAAGAA              | TCAAAGTCCCGCAGCAGC               | 54/5                               |
| Cxcr4b       | CCTGGAACAGGGTCTGGAGA             | TAGGGTTGAGACAGCAGTGGAA           | 54/5                               |
| Gata4        | CCTCGTCTCTCGCCATG                | GGTTTTGCTGATGTTTTTGGG            | 54/5                               |
| Gata6        | GAAAGCCGATACCTCCAA               | TATCCCTCGATGTGCCGTTAT            | 55/5                               |
| Gsc          | CGCTGGGATGTTTAGTATCGACA          | GGTGGAGCAGAACCGAGTCTT            | 53/5                               |
| H4           | CTCCCCGCTATAAGTGTATGTTT          | GCGTAAGTGGGCTGTGAGGTT            | 54/5                               |
| Nanog        | ACAGCCAGTACCCGGGACAC             | TTGGTCCGGCTCAGTCTTGT             | 54/5                               |
| Pax2a        | TGTTTGAGCGGCCGTC                 | CCTGCTCTGGCTTGATGTGTT            | 54/5                               |
| Pou2         | CCGTTTCATCCCCTCTCT               | TCCGCTAAAAAATCCTGGGC             | 54/5                               |
| Shh          | CACCTCCTTTTTGTCTCGACA            | TCCGGCTCGACACTGCTG               | 54/5                               |
| Ved          | TATCCCATCAGCCCCGC                | GGATGTACAGGGATGCTCGG             | 54/5                               |
| Vent         | GCGGATGAAGCTGAAGCG               | GAAAAACAGCGGGATAGAGGAA           | 55/5                               |
| Vox          | CCGTGGACTGGCTTGCTC               | TTGTCTTTTTCTCCGGCTCT             | 54/5                               |

(C) PRIMERS USED FOR CELL CULTURE (*M.M. ES CELL LINE E14*)

| Primer pairs | Sequence forward primer (5' → 3) | Sequence reverse primer (5' → 3) | Annealing temperature (°C)/time(s) |
|--------------|----------------------------------|----------------------------------|------------------------------------|
| pFIEN        | TGGGCAACGTGCTGGTTGTTGT           | TTCCAAGCGGCTTCGGCCAG             | 60/70                              |
| M.m. Nanog   | GGCAATTGATGAGTGTGGGTCTTCTG       | CCGCTCGAGTCATATTTACCTGGTGGAGTC   | 60/70                              |
| D.r. Nanog   | GGAATTCATGGCGGACTGGAAGATGC       | ACGCGTCTGACTCACAGCAAAGTTATTCCT   | 60/70                              |
| Xvent2       | GGAATTCATGACTAAAGCTTTCTCTC       | CCGCTCGAGCTAATAGGCCAGAGGTTGCCCA  | 60/70                              |

(continued)

SUPPLEMENTARY TABLE S1. (CONTINUED)

| Primer pairs       | Sequence forward primer (5' → 3) | Sequence reverse primer (5' → 3) | Annealing temperature (°C)/ time(s) |
|--------------------|----------------------------------|----------------------------------|-------------------------------------|
| <i>GAPDH</i>       | ACCACAGTCCATGCCATCAC             | TCCACCACCCTGTTGCTGTA             | 57/70                               |
| <i>M.m. H4</i>     | AAGCGCAAGACGGTTACGG              | TACAGAGTGCGGCCCTGG               | 54/5                                |
| <i>M.m. T</i>      | CCGGTGCTGAAGGTAATGTG             | GGTGTACAGCCGTCACGAAGTC           | 55/5                                |
| <i>M.m. Sox17</i>  | CCTTTGTGTATAAGCCCCGAGA           | CGTGGCTGTCTGAGAGGTTCA            | 52/5                                |
| <i>M.m. Pou5f1</i> | GTTGGCGTGGAGACTTTGCA             | GAGGTTCCCTCTGAGTTGCTTTC          | 54/5                                |
| <i>M.m. Sox2</i>   | TGGCCCAGGAGAACCCC                | GACAAAAGTTTCCACTCCGCG            | 54/5                                |

Denaturation temperature was set to 95°C and extension was done by 72°C for 14 s.

SUPPLEMENTARY TABLE S2. FREQUENCIES OF OBSERVED PHENOTYPES AFTER GAIN AND LOSS OF FUNCTION AND CHANGES IN MARKER GENE EXPRESSION

(A) IN SITU HYBRIDIZATION: DELOCALIZED EXPRESSION AFTER NANOG GAIN OF FUNCTION IN *DANIO RERIO* EMBRYOS

|                                   | Control injected % <sup>(a)</sup> | <i>D.r. Nanog</i> RNA (400 pg) % <sup>(a)</sup>                  |
|-----------------------------------|-----------------------------------|------------------------------------------------------------------|
| <i>Patched-1</i> at tailbud stage | 0 (0/17)                          | 72 (13/18) (lower expression, expression domain quite different) |
| <i>Sox17</i> at 80% epiboly       | 6 (2/31)                          | 46 (20/44) (dorsal forerunner cells dispersed along margin)      |
| <i>Shh</i> at tailbud stage       | 0 (0/33)                          | 82 (32/39) (expression domain shorter and wider)                 |

(B) SOUTHPAW IN SITU HYBRIDIZATION AFTER NANOG GAIN OF FUNCTION IN *DANIO RERIO* EMBRYOS

| At 20 hpf  | Wild type % <sup>(a)</sup> | Control injected % <sup>(a)</sup> | <i>D.r. Nanog</i> RNA (400 pg) % <sup>(a)</sup> |
|------------|----------------------------|-----------------------------------|-------------------------------------------------|
| Left side  | 76 (57/75)                 | 73 (35/48)                        | 50 (35/70)                                      |
| Right side | 4 (3/75)                   | 2 (1/48)                          | 7 (5/70)                                        |
| Both sides | 19 (14/75)                 | 23 (11/48)                        | 43 (30/70)                                      |

(C) LOSS OF FUNCTION, GAIN OF FUNCTION, AND RESCUE: *DANIO RERIO* EMBRYOS

| Analyzed at Phenotype               | 70%–80% epiboly Disturbed epiboly % <sup>(a)</sup> | 1 dpf Lethality % <sup>(a)</sup> |
|-------------------------------------|----------------------------------------------------|----------------------------------|
| Wild type                           | 1 (1/85)                                           | 9 (20/212)                       |
| ctrlMO                              | 2 (2/83)                                           | 11 (13/116)                      |
| NanogMO                             | 99 (102/103)                                       | 86 (120/139)                     |
| NanogMO + <i>D.r. mut-Nanog</i> RNA | 33 (9/27)                                          | 21 (18/86)                       |
| NanogMO + <i>M.m. Nanog</i> RNA     | 8 (3/31)                                           | 13 (4/31)                        |

(D) IN SITU HYBRIDIZATION: DECREASED EXPRESSION AFTER NANOG LOSS OF FUNCTION IN *DANIO RERIO* EMBRYOS

| At 70%–80% epiboly | controlMO % <sup>(a)</sup> | NanogMO % <sup>(a)</sup> |
|--------------------|----------------------------|--------------------------|
| <i>Ved</i>         | 0 (0/40)                   | 78 (28/36)               |
| <i>BMP4</i>        | 0 (0/53)                   | 100 (33/33)              |

(E) GAIN OF FUNCTION: *XENOPUS LAEVIS* EMBRYOS

| Analyzed at Phenotype          | Stage 11.5 Failure in blastopore formation % <sup>(a)</sup> | Stage 29                                  |                                            |                                                 |
|--------------------------------|-------------------------------------------------------------|-------------------------------------------|--------------------------------------------|-------------------------------------------------|
|                                |                                                             | No head, no cement gland % <sup>(a)</sup> | Head, but no cement gland % <sup>(a)</sup> | Head, but reduced cement gland % <sup>(a)</sup> |
| Wild type                      | 5 (2/37)                                                    | 2 (1/54)                                  | 0 (0/54)                                   | 4 (2/54)                                        |
| <i>D.r. Nanog</i> RNA (600 pg) | 43 (84/196)                                                 | 84 (76/91)                                | 2 (2/91)                                   | 3 (3/91)                                        |
| <i>M.m. Nanog</i> RNA (800 pg) | 42 (58/139)                                                 | 12 (14/119)                               | 7 (8/119)                                  | 26 (31/119)                                     |
| <i>Xvent2</i> RNA (800 pg)     | 42 (79/187)                                                 | 77 (97/126)                               | 9 (11/126)                                 | 3 (4/126)                                       |

<sup>a</sup>Observed phenotype/total number of embryos.

MO, morpholino oligonucleotides; hpf, hours postfertilization.

SUPPLEMENTARY TABLE S3. CHANGES IN THE RATE OF TRANSCRIPTION (NUMBERS IN BOLD) AS MONITORED BY REVERSE TRANSCRIPTASE-POLYMERASE CHAIN REACTION INCLUDING STANDARD DEVIATIONS (REGULAR NUMBERS)  
 (A) NANOG LOSS OF FUNCTION IN ZEBRAFISH EMBRYOS

|                  | <i>Pou2</i>         | <i>Cxcr4b</i>       | <i>Gsc</i>          | <i>Shh</i>          | <i>BMP4</i>         | <i>Vent</i>         | <i>Vox</i>          | <i>Ved</i>          | <i>Pax2a</i>        | <i>Gata6</i>        | <i>Gata4</i>        |
|------------------|---------------------|---------------------|---------------------|---------------------|---------------------|---------------------|---------------------|---------------------|---------------------|---------------------|---------------------|
| +1.5ng NanogMO   | <b>0.39</b><br>0.02 | <b>3.75</b><br>0.47 | <b>0.16</b><br>0.03 | <b>1.16</b><br>0.42 | <b>1.04</b><br>0.59 | <b>0.41</b><br>0.18 | <b>0.42</b><br>0.10 | <b>0.38</b><br>0.24 | <b>6.35</b><br>4.22 | <b>0.10</b><br>0.03 | <b>0.14</b><br>0.00 |
| +15 pg Nanog RNA | <b>1.65</b><br>0.13 | <b>0.74</b><br>0.21 | <b>1.56</b><br>0.09 | <b>0.83</b><br>0.10 | <b>1.37</b><br>0.28 | <b>1.19</b><br>0.31 | <b>1.12</b><br>0.30 | <b>1.33</b><br>0.20 | <b>0.88</b><br>0.04 | <b>1.21</b><br>0.14 | <b>0.99</b><br>0.27 |
| +60 pg Nanog RNA | <b>2.57</b><br>1.29 | <b>0.70</b><br>0.05 | <b>2.09</b><br>0.53 | <b>0.53</b><br>0.01 | <b>1.69</b><br>0.18 | <b>0.79</b><br>0.04 | <b>0.96</b><br>0.28 | <b>1.89</b><br>0.31 | <b>0.53</b><br>0.19 | <b>0.91</b><br>0.12 | <b>0.80</b><br>0.03 |

(B) NANOG GAIN OF FUNCTION IN ZEBRAFISH EMBRYOS

|                  | <i>Pou2</i>         | <i>Cxcr4b</i>       | <i>Gsc</i>          | <i>Shh</i>          | <i>BMP4</i>         | <i>Vent</i>         | <i>Vox</i>          | <i>Ved</i>          | <i>Pax2a</i>        | <i>Gata6</i>        | <i>Gata4</i>        |
|------------------|---------------------|---------------------|---------------------|---------------------|---------------------|---------------------|---------------------|---------------------|---------------------|---------------------|---------------------|
| +15 pg Nanog RNA | <b>1.65</b><br>0.13 | <b>0.74</b><br>0.21 | <b>1.56</b><br>0.09 | <b>0.83</b><br>0.10 | <b>1.37</b><br>0.28 | <b>1.19</b><br>0.31 | <b>1.12</b><br>0.30 | <b>1.33</b><br>0.20 | <b>0.88</b><br>0.04 | <b>1.21</b><br>0.14 | <b>0.99</b><br>0.27 |
| +60 pg Nanog RNA | <b>2.57</b><br>1.29 | <b>0.70</b><br>0.05 | <b>2.09</b><br>0.53 | <b>0.53</b><br>0.01 | <b>1.69</b><br>0.18 | <b>0.79</b><br>0.04 | <b>0.96</b><br>0.28 | <b>1.89</b><br>0.31 | <b>0.53</b><br>0.19 | <b>0.91</b><br>0.12 | <b>0.80</b><br>0.03 |

(C) GAIN OF FUNCTION OF M.M. NANOG, D.R. NANOG, XVENT1, AND XVENT2 IN XENOPUS EMBRYOS AT DIFFERENT DEVELOPMENTAL STAGES

| Stage    | <i>Sall4</i> | <i>Tert</i> | <i>Fut1</i> | <i>Klf4</i> | <i>Oct60</i> | <i>Cxcr4b</i> | <i>Wee1b</i> | <i>Cdx2</i> | <i>Xbra</i> | <i>Gsc</i> | <i>Siamois</i> | <i>Chordin</i> | <i>BMP4</i> | <i>Tsg1</i> | <i>Xema</i> | <i>dermin</i> | <i>XSox3</i> | <i>Sox3</i> | <i>Geminin</i> | <i>Ncam</i> | <i>Grh11</i> | Epidermal      |                |      |      |      |      |      |
|----------|--------------|-------------|-------------|-------------|--------------|---------------|--------------|-------------|-------------|------------|----------------|----------------|-------------|-------------|-------------|---------------|--------------|-------------|----------------|-------------|--------------|----------------|----------------|------|------|------|------|------|
|          |              |             |             |             |              |               |              |             |             |            |                |                |             |             |             |               |              |             |                |             |              | <i>Keratin</i> | <i>Xsox17α</i> |      |      |      |      |      |
| Stage 10 | M.m. Nanog   | 0.84        | 0.88        | 0.73        | 1.83         | 0.52          | 1.04         | 1.99        | 1.70        | 0.42       | 2.13           | 0.73           | 1.78        | 0.48        | 2.35        | 2.76          | 0.90         | 7.25        | 0.77           | 0.89        | 0.86         | 0.87           | 0.44           | 1.25 | 0.90 | 0.93 | 2.71 | 0.97 |
|          | D.r. Nanog   | 0.04        | 0.30        | 0.29        | 0.33         | 0.54          | 0.18         | 0.56        | 0.42        | 0.14       | 0.25           | 0.05           | 0.16        | 0.26        | 1.89        | 0.36          | 0.04         | 4.27        | 0.05           | 0.12        | 0.01         | 0.09           | 0.45           | 0.03 | 0.07 | 0.16 | 0.41 | 0.07 |
|          | Xvent1       | 0.75        | 1.62        | 0.33        | 2.44         | 0.29          | 0.44         | 2.90        | 8.91        | 0.46       | 1.30           | 0.41           | 0.41        | 0.33        | 4.25        | 1.02          | 1.06         | 3.88        | 0.54           | 0.94        | 1.65         | 1.02           | 0.10           | 0.65 | 0.38 | 0.27 | 4.94 | 0.48 |
|          | Xvent2       | 0.05        | 0.28        | 0.02        | 0.86         | 0.03          | 0.01         | 2.18        | 6.05        | 0.13       | 0.16           | 0.02           | 0.04        | 0.12        | 0.76        | 0.03          | 0.09         | 0.21        | 0.13           | 0.05        | 0.94         | 0.15           | 0.01           | 0.08 | 0.08 | 0.01 | 0.53 | 0.37 |
|          | M.m. Nanog   | 0.74        | 0.85        | 0.82        | 1.74         | 0.51          | 0.58         | 3.62        | 0.93        | 0.44       | 0.11           | 0.73           | 0.32        | 0.68        | 5.16        | 0.22          | 1.00         | 0.71        | 0.41           | 0.72        | 1.64         | 0.98           | 0.71           | 0.87 | 0.53 | 0.89 | 2.78 | 2.46 |
|          | D.r. Nanog   | 0.18        | 0.13        | 0.06        | 0.22         | 0.25          | 0.20         | 2.35        | 0.40        | 0.13       | 0.08           | 0.13           | 0.16        | 0.52        | 1.59        | 0.08          | 0.02         | 0.24        | 0.02           | 0.03        | 1.26         | 0.11           | 0.26           | 0.06 | 0.06 | 0.09 | 0.57 | 1.48 |
| Stage 11 | M.m. Nanog   | 0.79        | 0.87        | 0.65        | 0.91         | 0.44          | 1.16         | 1.47        | 5.24        | 2.44       | 0.19           | 0.81           | 0.09        | 0.95        | 1.19        | 0.57          | 1.11         | 0.25        | 0.46           | 0.46        | 0.63         | 1.02           | 1.44           | 1.27 | 0.95 | 1.10 | 2.22 | 0.48 |
|          | D.r. Nanog   | 0.04        | 0.09        | 0.06        | 0.26         | 0.28          | 0.16         | 1.24        | 1.97        | 1.18       | 0.15           | 0.06           | 0.01        | 0.45        | 0.03        | 0.42          | 0.02         | 0.07        | 0.04           | 0.04        | 0.12         | 0.15           | 0.59           | 0.00 | 0.09 | 0.08 | 1.99 | 0.10 |
|          | Xvent1       | 0.86        | 0.41        | 0.73        | 1.79         | 0.20          | 1.03         | 2.57        | 0.96        | 0.69       | 1.48           | 0.85           | 2.03        | 2.66        | 2.97        | 1.68          | 1.63         | 1.00        | 0.84           | 0.90        | 1.47         | 1.26           | 0.27           | 0.32 | 0.71 | 1.18 | 4.72 | 2.25 |
|          | Xvent2       | 0.01        | 0.36        | 0.10        | 0.34         | 0.06          | 0.01         | 1.12        | 0.11        | 0.02       | 0.54           | 0.18           | 1.52        | 0.25        | 0.60        | 0.18          | 0.71         | 0.36        | 0.09           | 0.35        | 0.44         | 0.29           | 0.04           | 0.24 | 0.02 | 0.21 | 0.60 | 0.46 |
|          | M.m. Nanog   | 0.70        | 0.54        | 0.34        | 1.69         | 0.61          | 0.57         | 1.69        | 1.26        | 0.53       | 0.99           | 0.44           | 0.39        | 0.51        | 0.76        | 0.56          | 1.32         | 0.99        | 0.57           | 1.07        | 1.16         | 1.01           | 0.18           | 0.31 | 0.70 | 0.33 | 2.40 | 1.53 |
|          | D.r. Nanog   | 0.01        | 0.18        | 0.05        | 0.51         | 0.32          | 0.06         | 0.88        | 0.28        | 0.21       | 0.15           | 0.15           | 0.06        | 0.05        | 0.21        | 0.13          | 0.06         | 0.68        | 0.4            | 0.04        | 0.37         | 0.08           | 0.04           | 0.11 | 0.09 | 0.11 | 1.11 | 0.65 |
| Stage 12 | M.m. Nanog   | 2.26        | 1.26        | 1.09        | 1.69         | 1.30          | 0.99         | 1.74        | 0.80        | 1.16       | 0.09           | 0.93           | 0.46        | 1.36        | 1.72        | 0.22          | 3.35         | 1.25        | 0.41           | 1.41        | 4.10         | 1.64           | 1.31           | 0.49 | 0.16 | 0.70 | 2.63 | 2.14 |
|          | D.r. Nanog   | 0.87        | 0.25        | 0.33        | 1.32         | 0.62          | 0.18         | 0.81        | 0.06        | 0.50       | 0.04           | 0.21           | 0.10        | 0.35        | 1.22        | 0.01          | 0.84         | 0.48        | 0.10           | 0.05        | 2.62         | 1.18           | 0.21           | 0.12 | 0.05 | 0.22 | 1.85 | 0.81 |
|          | Xvent1       | 0.67        | 0.54        | 0.97        | 1.72         | 0.74          | 0.69         | 0.24        | 1.03        | 1.59       | 0.12           | 0.65           | 0.10        | 1.33        | 1.05        | 0.31          | 0.93         | 0.45        | 0.56           | 0.64        | 0.42         | 1.10           | 1.93           | 1.09 | 1.17 | 0.76 | 3.92 | 0.50 |
|          | Xvent2       | 0.15        | 0.21        | 0.06        | 0.63         | 0.11          | 0.08         | 0.08        | 0.06        | 0.01       | 0.01           | 0.06           | 0.04        | 0.03        | 1.16        | 0.05          | 0.16         | 0.23        | 0.08           | 0.12        | 0.05         | 0.19           | 0.21           | 0.54 | 0.20 | 0.10 | 0.48 | 0.16 |
|          | M.m. Nanog   | 1.18        | 2.55        | 0.49        | 3.58         | 2.35          | 1.34         | 2.73        | 1.43        | 0.88       | 2.39           | 0.90           | 2.14        | 3.61        | 0.12        | 3.64          | 1.71         | 0.79        | 0.98           | 1.31        | 1.79         | 1.02           | 0.44           | 0.74 | 0.23 | 0.97 | 2.45 | 1.22 |
|          | D.r. Nanog   | 0.42        | 0.61        | 0.27        | 1.11         | 0.21          | 0.43         | 1.24        | 0.22        | 0.03       | 0.41           | 0.53           | 0.62        | 0.11        | 0.07        | 2.32          | 0.23         | 0.18        | 0.32           | 0.11        | 0.30         | 0.07           | 0.13           | 0.31 | 0.08 | 0.52 | 0.36 | 0.17 |
| Stage 12 | M.m. Nanog   | 1.14        | 3.79        | 0.44        | 4.35         | 3.13          | 1.20         | 2.56        | 0.94        | 0.71       | 2.40           | 0.46           | 3.72        | 6.49        | 1.31        | 1.00          | 2.03         | 0.81        | 0.64           | 1.62        | 1.18         | 0.90           | 0.33           | 0.59 | 0.35 | 0.47 | 3.30 | 2.39 |
|          | D.r. Nanog   | 1.11        | 1.85        | 0.13        | 2.42         | 1.85          | 0.19         | 2.40        | 0.08        | 0.12       | 0.50           | 0.17           | 1.56        | 6.17        | 0.86        | 0.37          | 0.14         | 0.17        | 0.18           | 0.08        | 0.12         | 0.29           | 0.21           | 0.13 | 0.04 | 0.04 | 1.79 | 1.37 |
|          | Xvent1       | 0.62        | 0.79        | 0.55        | 1.10         | 1.75          | 0.69         | 0.71        | 0.31        | 0.42       | 0.05           | 0.28           | 0.08        | 0.28        | 0.93        | 0.85          | 1.07         | 0.28        | 0.26           | 0.55        | 0.63         | 1.69           | 0.63           | 0.39 | 0.35 | 0.45 | 1.87 | 1.35 |
|          | Xvent2       | 0.01        | 0.30        | 0.06        | 0.68         | 1.04          | 0.16         | 0.08        | 0.26        | 0.34       | 0.04           | 0.13           | 0.07        | 0.09        | 0.48        | 0.10          | 0.08         | 0.13        | 0.08           | 0.01        | 0.11         | 0.53           | 0.01           | 0.19 | 0.35 | 0.15 | 0.14 | 0.15 |
|          | M.m. Nanog   | 0.92        | 3.28        | 1.21        | 1.33         | 1.68          | 0.86         | 2.62        | 1.64        | 1.73       | 0.21           | 0.96           | 0.11        | 2.81        | 2.07        | 3.35          | 1.18         | 0.93        | 0.65           | 0.66        | 0.73         | 1.26           | 2.72           | 1.71 | 1.44 | 1.00 | 1.42 | 0.92 |
|          | D.r. Nanog   | 0.25        | 3.77        | 0.08        | 0.13         | 0.06          | 0.25         | 0.68        | 0.15        | 0.32       | 0.19           | 0.11           | 0.01        | 1.61        | 0.73        | 1.41          | 0.04         | 0.06        | 0.11           | 0.00        | 0.01         | 0.02           | 0.04           | 0.70 | 1.12 | 0.21 | 0.57 | 0.57 |
